# Supplementary material for: Synthesis and optical properties of gold nanoparticle networks cross-linked with chain-length-controlled polymers
Source: Royal Society of Chemistry journal article supplement (doi:10.1039/c5ra02264a), 2015-01-01
Supplement: c5ra02264a1.pdf [file c5ra02264a1.pdf]

## Supplementary Information:

### **Synthesis and optical properties of gold nanoparticle networks cross-linked with chain-length-controlled polymers**

*Emi Sugata and Seiya Kobatake\**

*Department of Applied Chemistry, Graduate School of Engineering, Osaka City University, 3-3-138 Sugimoto, Sumiyoshi-ku, Osaka 558-8585, Japan*

\*E-mail: kobatake@a-chem.eng.osaka-cu.ac.jp

## Contents:

**Figure S1.**  $^1\text{H}$  NMR spectrum of BTTEB in  $\text{CDCl}_3$ .

**Figure S2.** GPC curves of polystyrenes synthesized by RAFT polymerization using BTTMB as the RAFT agent.

**Figure S3.** GPC curves of polystyrenes synthesized by RAFT polymerization using BTTEB as the RAFT agent.

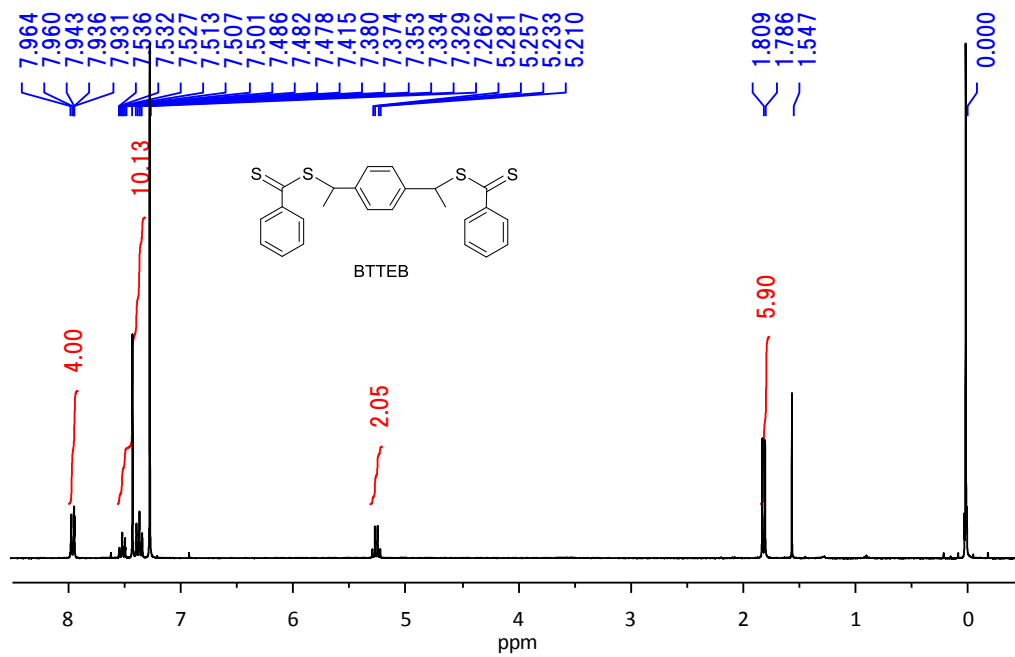

**Figure S1.** <sup>1</sup>H NMR spectrum of BTTEB in CDCl<sub>3</sub>.

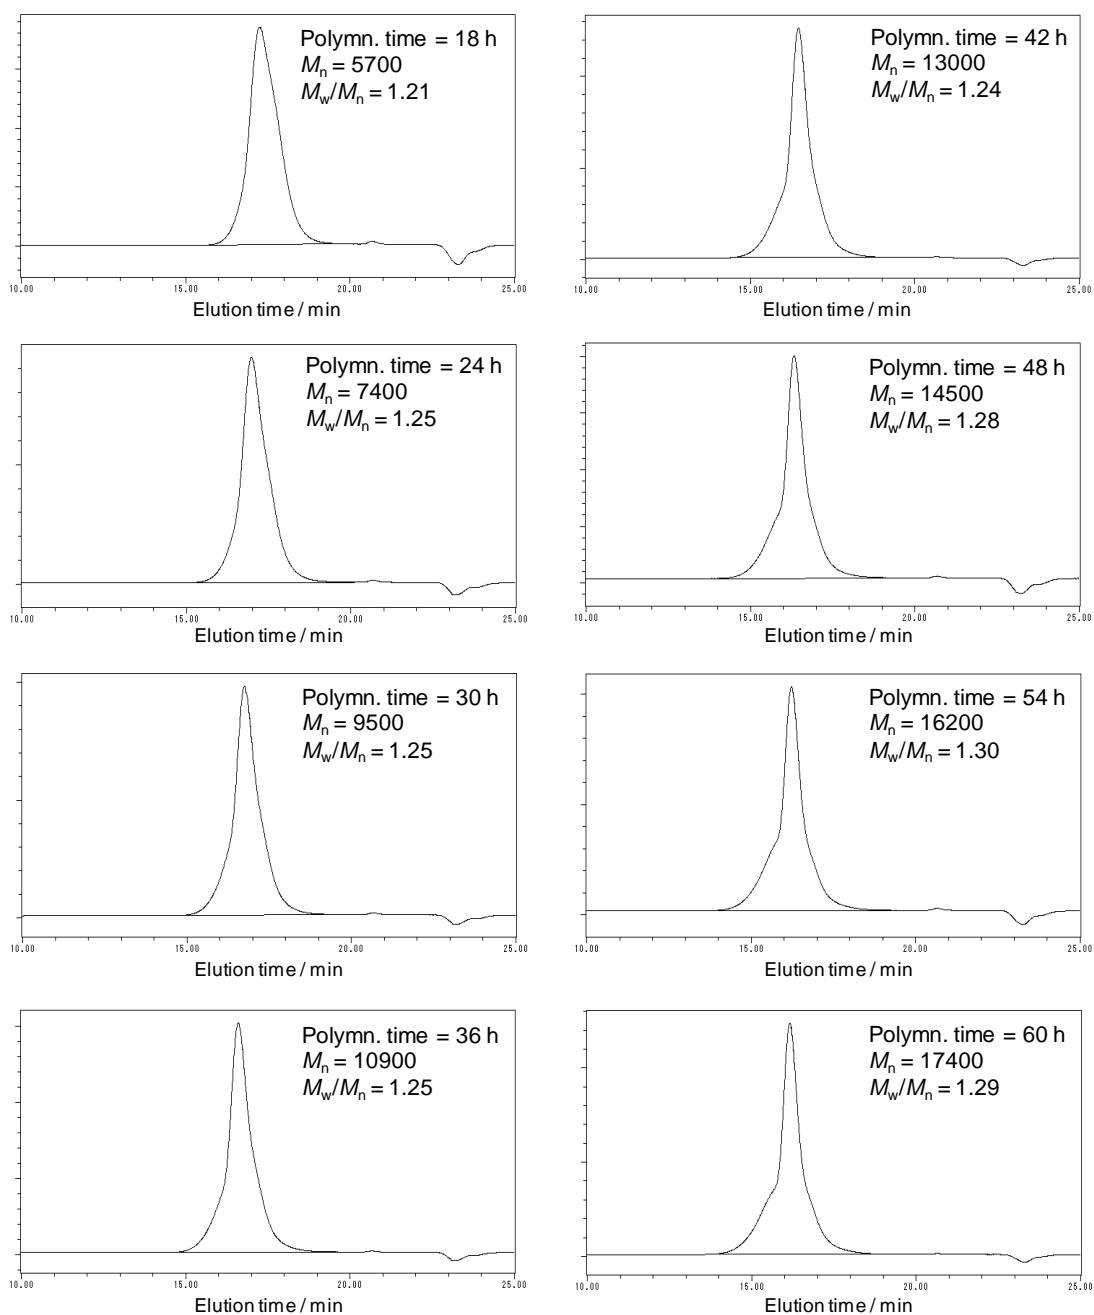

**Figure S2.** GPC curves of polystyrenes synthesized by RAFT polymerization using BTTMB as the RAFT agent.

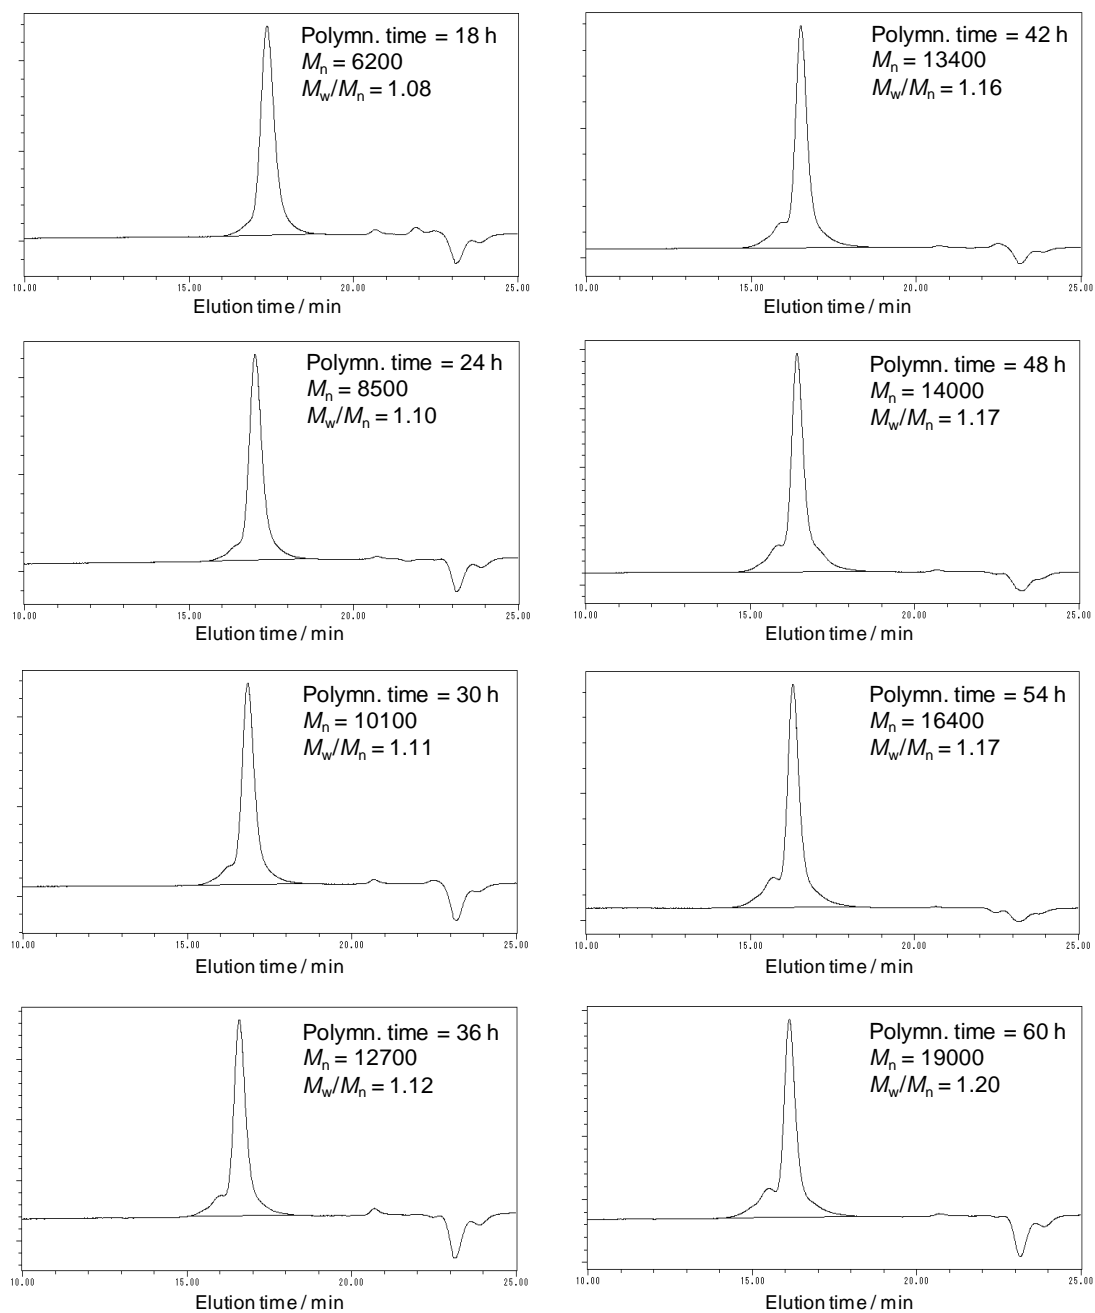

**Figure S3.** GPC curves of polystyrenes synthesized by RAFT polymerization using BTTEB as the RAFT agent.
